# Supplementary material for: Glucose confers protection to Escherichia coli against contact killing by Vibrio cholerae
Source: PubMed Central journal article supplement (PMC7858629; doi:10.1038/s41598-021-81813-4), 2021-02-03
Supplement: 41598_2021_81813_MOESM1_ESM.pdf [file 41598_2021_81813_MOESM1_ESM.pdf]

**Table S1: *E. coli* and *V. cholerae* strains and plasmids used in this study.**

**Bacterial Strains**

| <b>Strain Number</b> | <b>Strain Background</b>           | <b>Genotype</b>                                                                                       | <b>Plasmid</b>      | <b>Reference</b>                                    |
|----------------------|------------------------------------|-------------------------------------------------------------------------------------------------------|---------------------|-----------------------------------------------------|
| <b>CC151</b>         | NRD204<br><i>E. coli</i> MG1655    | <i>araBAD::cat</i>                                                                                    |                     | De Lay and Cronan. J. Biol. Chem. 2007              |
| <b>CC130</b>         | <i>E. coli</i> Nissle              | WT                                                                                                    | pSLS3               | Sonnenborn. FEMS Microbiol Lett. 2016. This study   |
| <b>CC142</b>         | <i>E. coli</i> ECOR-2              | WT                                                                                                    | pSLS3               | Ochman and Selander. 1984. J. Bacteriol. This study |
| <b>CC143</b>         | <i>E. coli</i> HS                  | WT                                                                                                    | pSLS3               | Levine et al. Lancet. 1978. This study              |
| <b>CC116</b>         | <i>E. coli</i> MG1655              | <i>araBAD::cat</i><br><i>lacZ::pKAS-sfGFP</i>                                                         |                     | This study                                          |
| <b>CC147</b>         | <i>E. coli</i> MG1655              | <i>araBAD::cat</i>                                                                                    | pUC18- <i>rcsA</i>  | This study                                          |
| <b>SSW11</b>         | <i>E. coli</i> MG1655              | <i>araBAD::cat</i>                                                                                    | pUC18               | This study                                          |
| <b>CC132</b>         | <i>E. coli</i> MG1655              | <i>araBAD::cat</i><br><i>crp::specR</i>                                                               |                     | This study                                          |
| <b>CC133</b>         | <i>E. coli</i> MG1655              | <i>araBAD::cat</i><br><i>crp::specR</i>                                                               | pEVS143- <i>crp</i> | This study                                          |
| <b>CC140</b>         | <i>E. coli</i> MG1655              | <i>araBAD::cat</i><br><i>crp::specR</i>                                                               | pEVS143             | This study                                          |
| <b>SSW17</b>         | <i>E. coli</i> MG1655              | <i>araBAD::cat</i><br><i>crp::specR</i><br><i>lacZ::pKAS-sfGFP</i>                                    |                     | This study                                          |
| <b>JT101</b>         | <i>V. cholerae</i><br>C6706* T6SS+ | <i>ptac-qstR</i>                                                                                      |                     | Thomas et al. mBio. 2017, This study                |
| <b>JT932</b>         | <i>V. cholerae</i><br>C6706* T6SS- | <i>ptac-qstR</i><br>$\Delta$ <i>vasK</i>                                                              |                     | Thomas et al. mBio. 2017, This study                |
| <b>CC144</b>         | <i>V. cholerae</i><br>C6706 target | $\Delta$ <i>vasK lacZ::specR</i><br>$\Delta$ <i>tsiV1</i> $\Delta$ <i>tsiV2</i> $\Delta$ <i>tsiV3</i> | pSLS3               | This study                                          |
| <b>SW491</b>         | <i>V. cholerae</i> V52             | WT                                                                                                    |                     | Pukatzki et al. PNAS. 2006                          |
| <b>BGT49</b>         | <i>V. cholerae</i> VC56            | WT                                                                                                    |                     | Bernardy et al. Appl. Env. Micro. 2016.             |
| <b>BGT64</b>         | <i>V. cholerae</i><br>692-79       | WT                                                                                                    |                     | Bernardy et al. Appl. Env. Micro. 2016.             |
| <b>BGT69</b>         | <i>V. cholerae</i><br>3223-74      | WT                                                                                                    |                     | Bernardy et al. Appl. Env. Micro. 2016.             |

|              |                                                     |                                                                                  |         |                                |
|--------------|-----------------------------------------------------|----------------------------------------------------------------------------------|---------|--------------------------------|
| <b>KW25</b>  | <i>V. cholerae</i><br>C6706* T6SS+                  | <i>ptac-qstR</i><br><i>lacZ::aux 5a</i>                                          |         | Crisan et al. Genome Bio. 2019 |
| <b>CC145</b> | <i>Aeromonas veronii</i>                            | WT                                                                               | pSLS3   | This study                     |
| <b>JT821</b> | <i>V. cholerae</i><br>C6706                         | $\Delta vasK$ <i>lacZ::specR</i><br>$\Delta tsiV1$ $\Delta tsiV2$ $\Delta tsiV3$ |         | This study                     |
| <b>CC159</b> | <i>E. coli</i> MG1655                               | WT                                                                               | pEVS143 | This study                     |
| <b>KW26</b>  | <i>V. cholerae</i><br>C6706* T6SS+<br>$\Delta vasK$ | <i>ptac-qstR</i> $\Delta vasK$<br><i>lacZ::aux 5a</i>                            |         | Crisan et al. Genome Bio. 2019 |

### Plasmids

| Plasmid            | Features         | Antibiotic Resistance | Reference                           |
|--------------------|------------------|-----------------------|-------------------------------------|
| <b>pSLS3</b>       |                  | Chloramphenicol       | Tu and Bassler. Genes Dev. 2007     |
| <b>pUC18</b>       |                  | Ampicillin            | Norrande et al. Gene. 1983.         |
| <b>pUC18-rcsA</b>  | <i>ptac-rcsA</i> | Ampicillin            | This study                          |
| <b>pEVS143</b>     |                  | Kanamycin             | Dunn et al. Appl. Env. Micro. 2006. |
| <b>pEVS143-crp</b> | <i>ptac-crp</i>  | Kanamycin             | This study                          |
